# Supplementary material for: Am80‐GCSF synergizes myeloid expansion and differentiation to generate functional neutrophils that reduce neutropenia‐associated infection and mortality
Source: PubMed Central journal article supplement (PMC5090663; doi:10.15252/emmm.201606434), 2016-10-13
Supplement: EMMM-8-1340-s001.pdf [file EMMM-8-1340-s001.pdf]

**Appendix**

1. Appendix figures and figure legends S1 to S5.....Page 2-8
2. Appendix tables and table legends S1 to S4.....Page 9-24
3. References.....Page 25

1) Appendix Supplemental Figures and Figure Legends

Appendix Figure S1

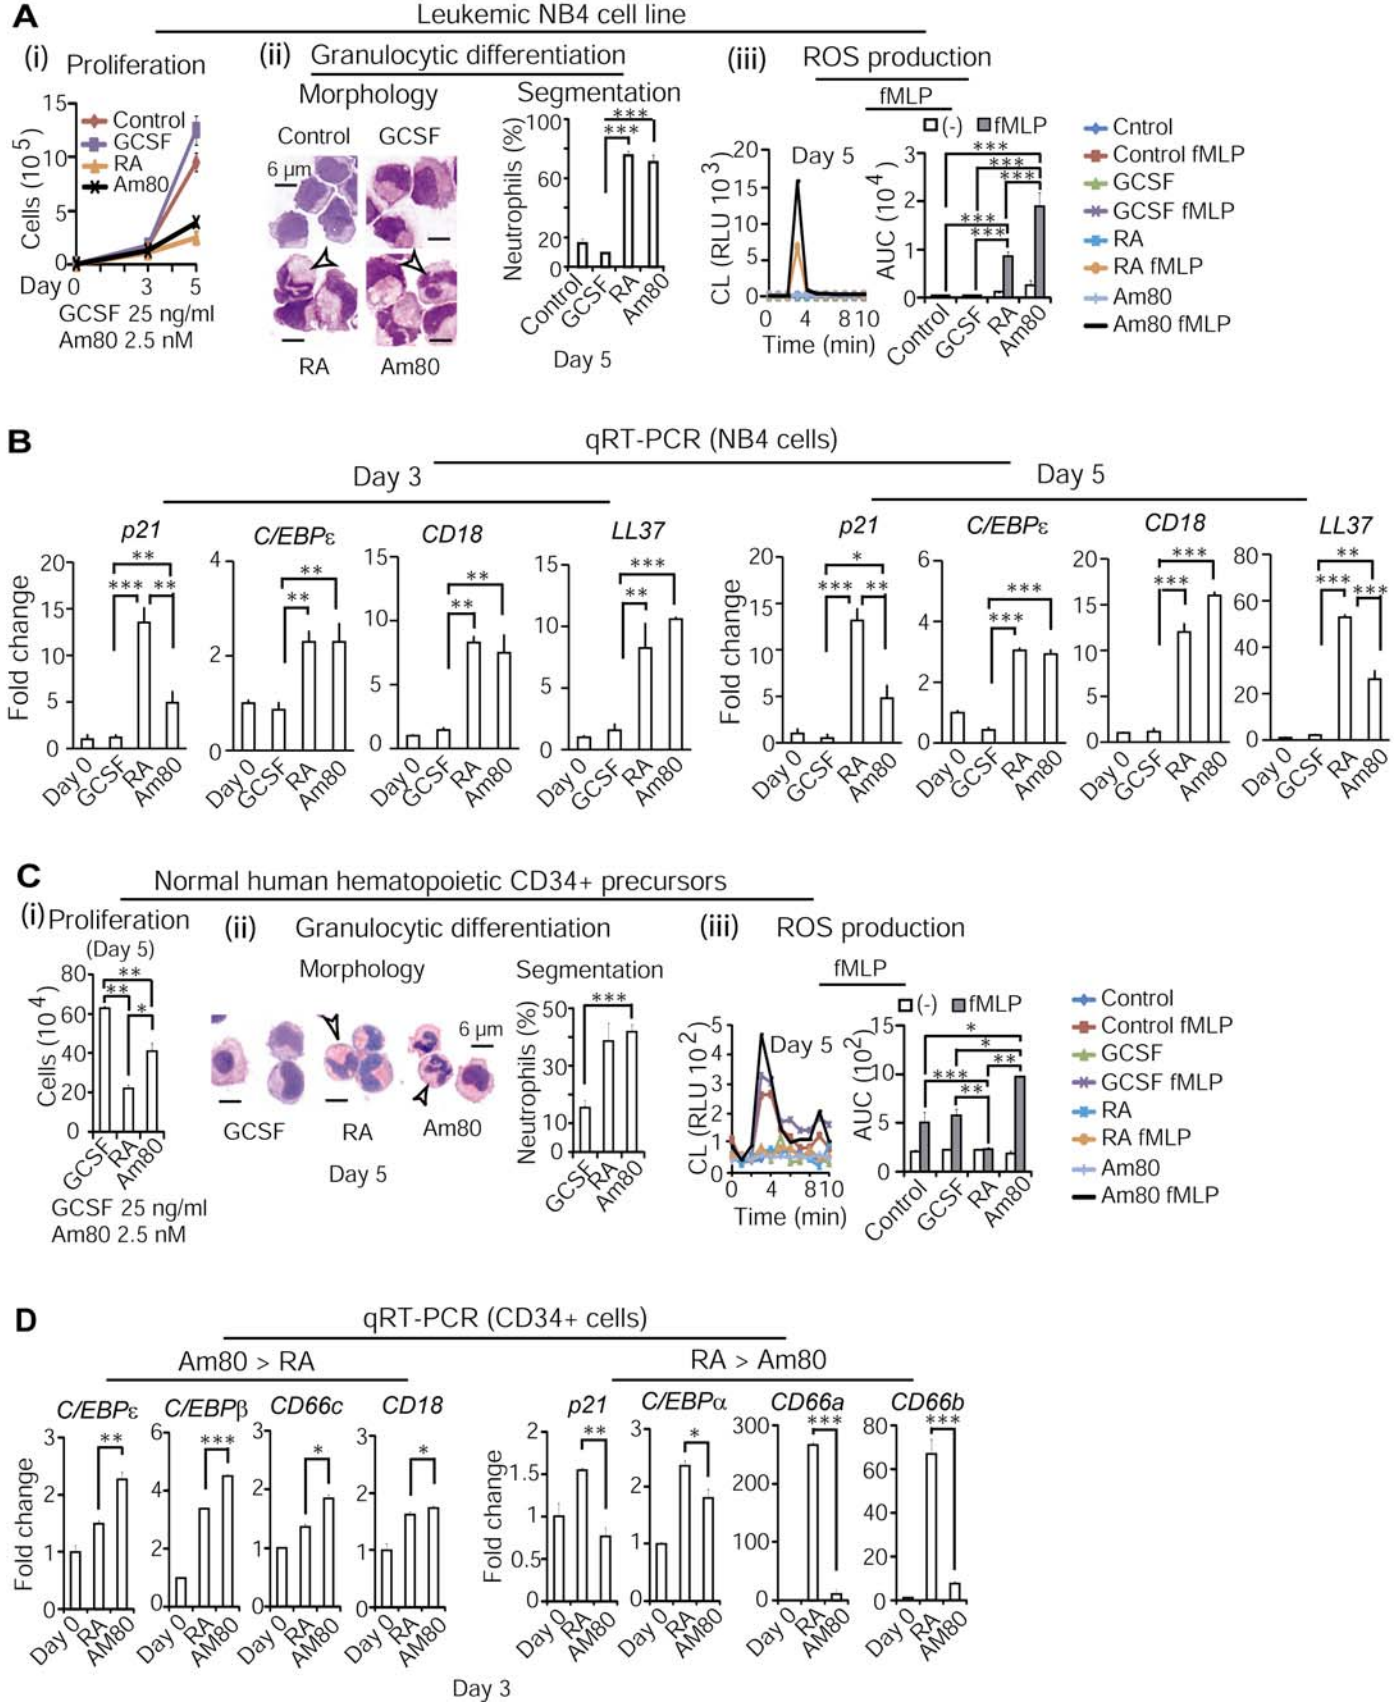

**Appendix Figure S1. Am80 promotes neutrophil differentiation, enhances ROS production, and alters transcription of RA-target genes in human hematopoietic precursors. (A)** Both Am80 and RA, but not GCSF, inhibited leukemic growths of NB4 cells (section *i*) while enhancing granulocytic morphologic differentiation (section *ii*). Am80 promoted significantly higher ROS production than did RA, whereas GCSF failed to induce ROS production (section *iii*). White arrows indicate nuclear segmentations of neutrophils. ROS, reactive oxygen species. CL, chemiluminescence; RLU, relative light units; AUC, area under the curve. Leukemia NB4 cells, as described before (Chaudhry et al, 2012; Wang et al, 2006), were tested for mycoplasma-free by PCR analysis. These NB4 cells from passages 5 to 15 were used for less than five months. **(B)** qRT-PCR analyses of differential expression of RA-target genes mediated by RA, Am80, and GCSF in parallel. RA promoted the highest expression of cell cycle inhibitor  $p21^{Cip/Kip}$ . **(C)** In normal primary human hematopoietic CD34+ precursors, RA inhibited proliferation (section *i*) and promoted granulocytic differentiation (section *ii*) whereas was much less efficient for inducing ROS production (section *iii*). On the other hand, GCSF displayed the least effect on inducing granulocytic morphology differentiation compared RA or Am80, while Am80 significantly promoted ROS production, compared to GCSF or RA. **(D)** Compared to RA, Am80 altered transcription pattern of RA-induced target genes regulating granulocytic differentiation in CD34+ cells. Data are shown as mean  $\pm$  SD and represent at least 2 independent experiments with similar results. RA (Sigma-Aldrich) was dissolved in 100% ethanol, and 1  $\mu$ M RA was used for NB4 cells while 0.5  $\mu$ M RA for CD34+ cells. \*, P < 0.05; \*\*, P < 0.01; \*\*\*, P < 0.001. Numbers of P values are provided in Appendix Table S4.

## Appendix Figure S2

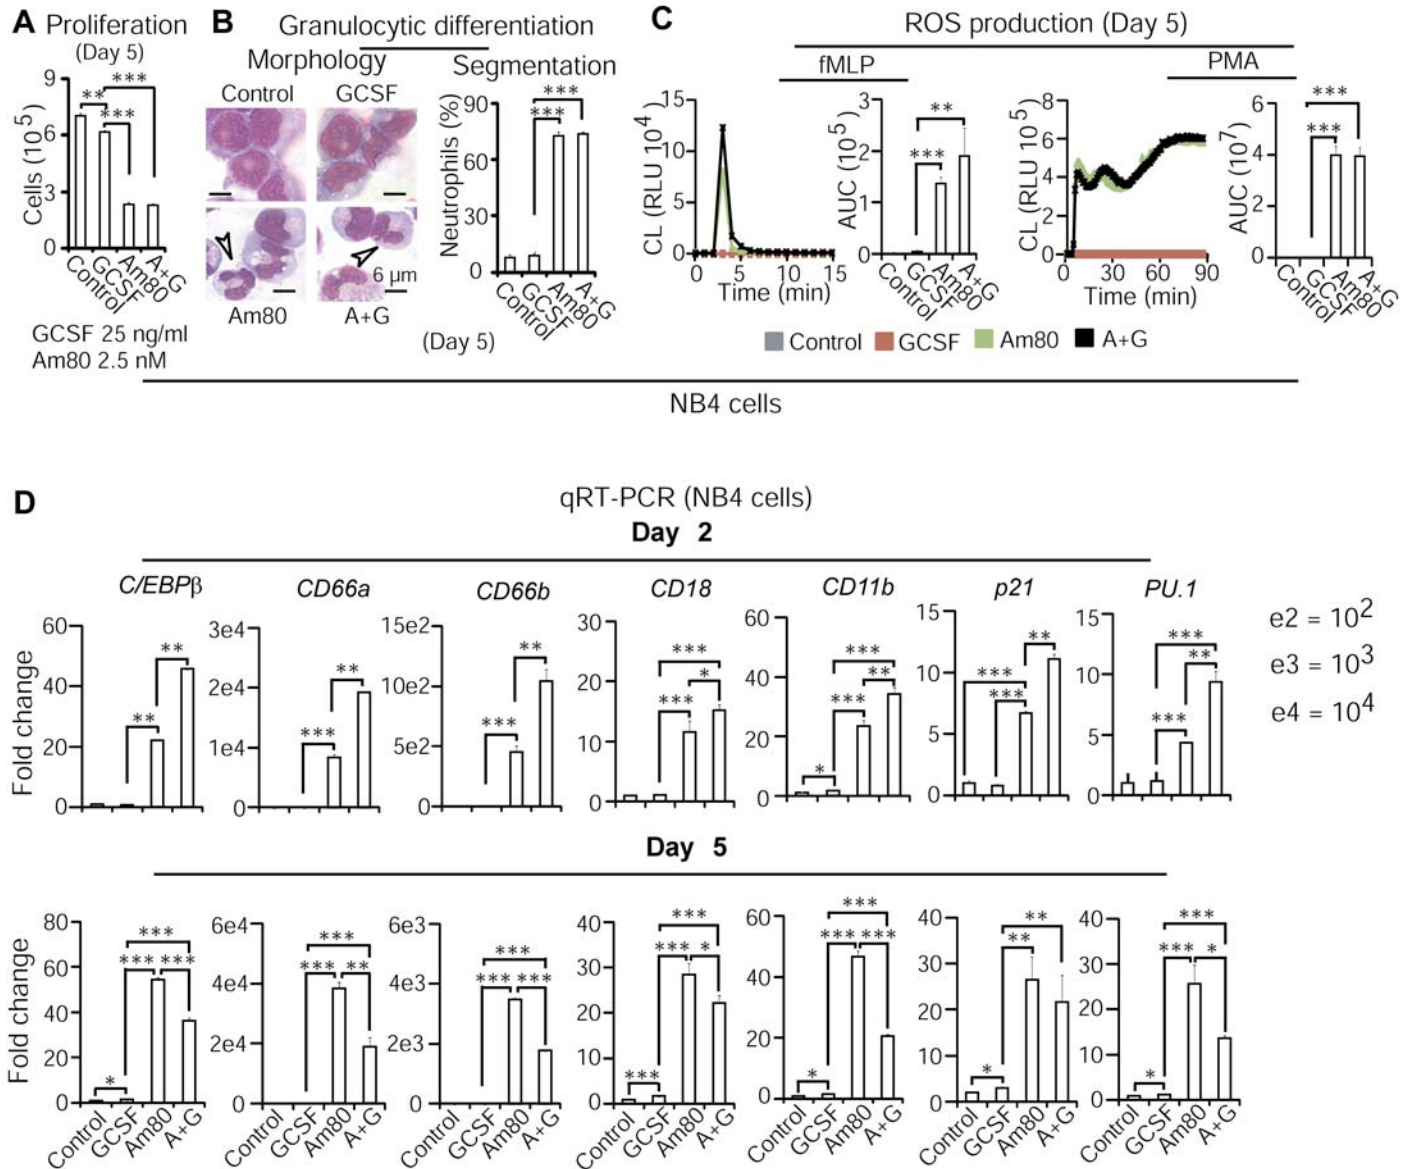

**Appendix Figure S2. Am80-GCSF combination significantly promotes granulocytic differentiation, ROS production, and alters transcription of RA-target genes in NB4 cells. (A-C)** Am80-GCSF combination significantly inhibited cell proliferation (panel A). This inhibition was associated with enhanced granulocytic differentiation (panel B) and promoted ROS production (panel C) on day 5. GCSF failed to induce granulocytic differentiation and ROS production in NB4 cells. White arrows indicate nuclear segmentation of neutrophils. **(D)** Am80-GCSF induced significantly higher expression of RA-target genes on day 2 compared to Am80, whereas Am80 induced higher expression of these same RA-target genes on day 5. GCSF did not induce transcription

of RA-target genes in NB4 cells. Data are shown as mean  $\pm$  SD and represent at least two independent experiments with similar results. \*:  $P < 0.05$ ; \*\*:  $P < 0.01$ ; \*\*\*:  $P < 0.001$ . Numbers of P values are provided in Appendix Table S4.

### Appendix Figure S3

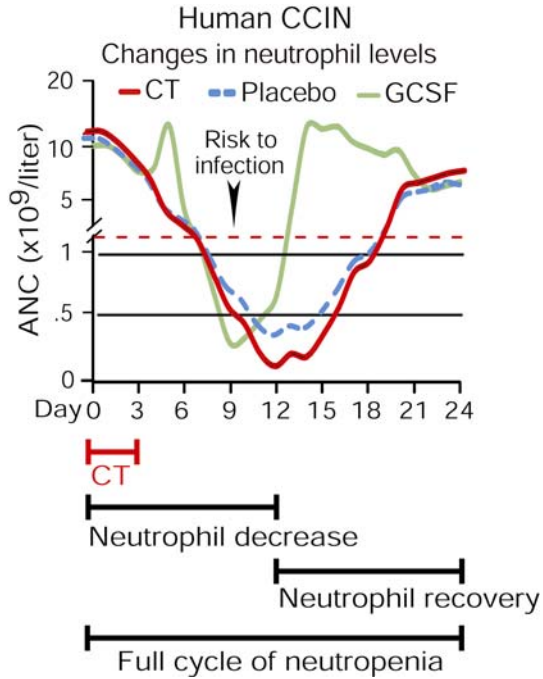

**Appendix Figure S3. Neutrophil levels in human cancer chemotherapy-induced neutropenia.** Human cancer chemotherapy-induced neutropenia (CCIN) consists of neutrophil decrease and neutrophil recovery stages, and the median duration of CCIN is 9-15 days ( $ANC < 1.5 \times 10^9/L$ ), as described by other groups' studies (Crawford et al, 1991; Trillet-Lenoir et al, 1993). GCSF cannot prevent neutrophil reduction in the neutrophil decrease stage of human CCIN. During neutrophil recovery stage, although GCSF profoundly increases the number of neutrophils to reduce the duration of neutropenia, these neutrophils are inadequately differentiated with impaired microbicidal function that cannot effectively reduce human CCIN-associated infection and mortality (Bohlius et al, 2008; Gurion et al, 2012; Hartmann et al, 1997; Heath et al, 2003; Mhaskar et al, 2014; Sung et al, 2007). CT, chemotherapy; ANC, absolute neutrophil count.

**Appendix Figure S4**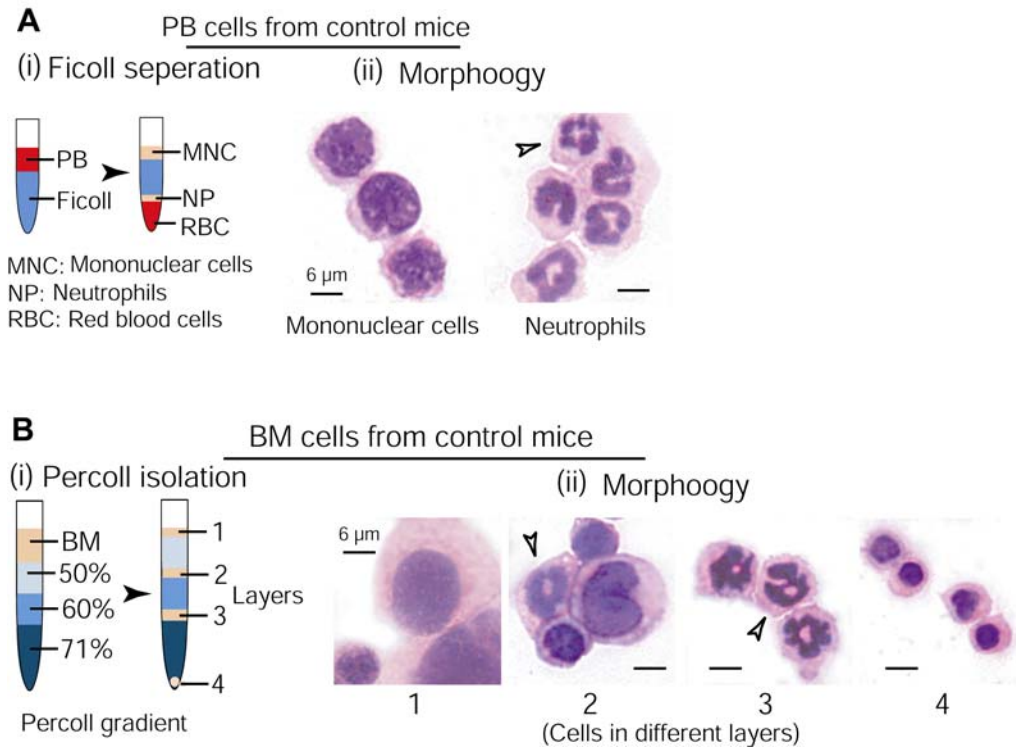

**Appendix Figure S4. Identifying PB and BM neutrophils collected from control mice.** (A) PB mononuclear cells and neutrophils from control mice were separated with Ficoll isolation and identified with granulocytic morphologic analysis. (B) Less- and more-matured BM neutrophils of control mice were identified in the second and third layers, respectively, with Percoll gradient segregation and granulocytic morphologic analysis.

**Appendix Figure S5**

**A Survival model #1  
Low dose 4 hr post-CPA**

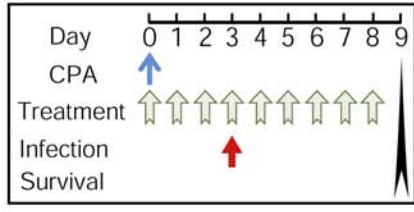

GCSF 25 µg/kg; Am80 0.5 mg/kg

**a-i Survival time since CPA injection**

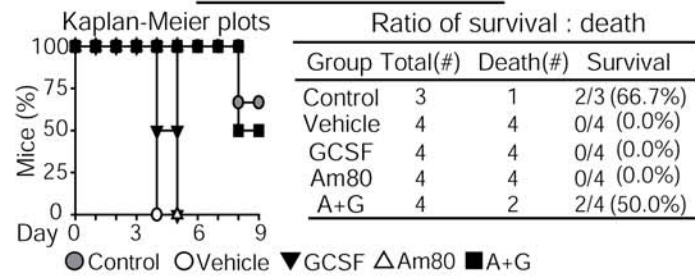

**a-ii Survival time since CPA injection**

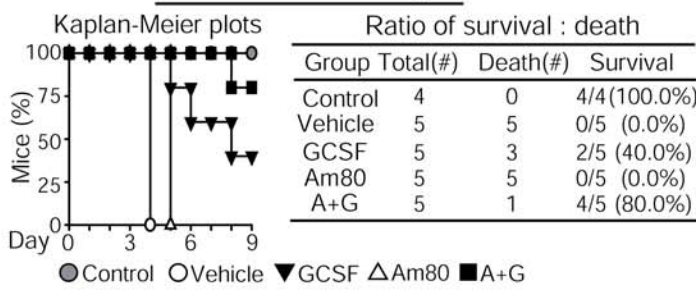

**a-iii Survival time since CPA injection**

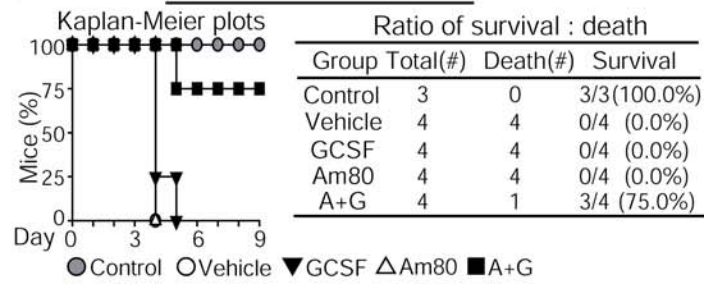

**B Survival model #2  
Low dose 24 hr post-CPA**

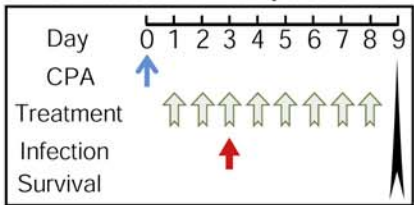

GCSF 25 µg/kg; Am80 0.5 mg/kg

**b-i Survival time since CPA injection**

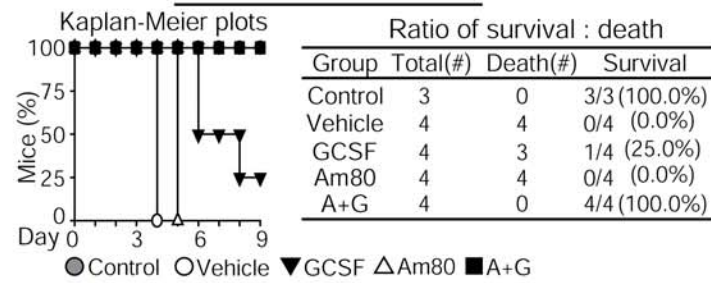

**b-ii Survival time since CPA injection**

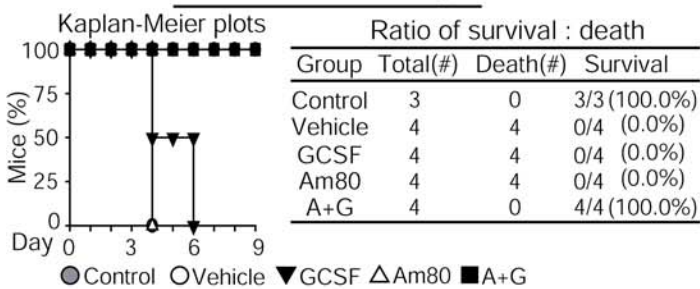

**C Survival model #3  
Medium dose 24 hr post-CPA**

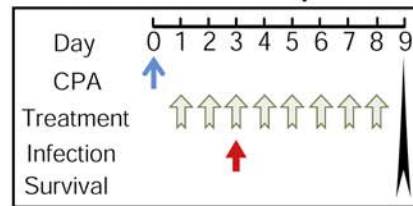

GCSF 50 µg/kg; Am80 1 mg/kg

**c-i Survival time since CPA injection**

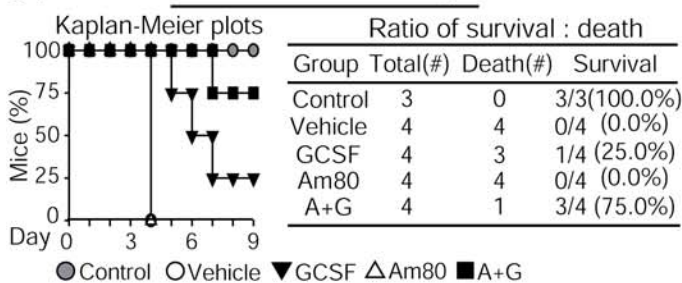

**c-ii Survival time since CPA injection**

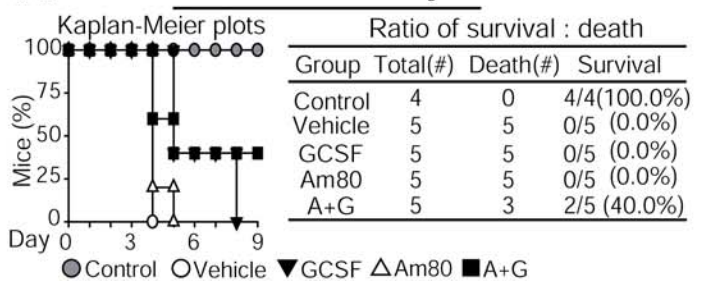

**Appendix Figure S5. Each of individual tests performed in different survival models of mouse CCIN. (A)**

Survival model #1 of mouse CCIN treated with low dose of Am80-GCSF after 4 hrs of CPA injection. (a-i to a-iii) Three independent experiments were performed with survival model #1 to evaluate the infection-related mortality of CCIN mice. Kaplan-Meier plots analysis was used to calculate survival rate of CCIN mice. **(B)**

Survival model #2 of mouse CCIN treated with low dose of Am80-GCSF after 24 hrs of CPA injection. (b-i & b-ii) Two independent experiments were performed with survival model #2 to evaluate the infection-related mortality of CCIN mice. Kaplan-Meier plots analysis was used to calculate survival rate of CCIN mice. **(C)**

Survival model #3 of mouse CCIN treated with medium dose of Am80-GCSF after 24 hrs of CPA injection. (c-i & c-ii) Two independent experiments were performed with survival model #3 to evaluate the infection-related mortality of CCIN mice. Kaplan-Meier plots analysis was used to calculate survival rate of CCIN mice.



## 2) Appendix Supplemental Tables and Table Legends

### Appendix Table S1

| Human plasma concentration*       |         |      | Cell culture concentration |              |
|-----------------------------------|---------|------|----------------------------|--------------|
| Oral dose<br>(mg/m <sup>2</sup> ) | PK Cmax |      | Cell types                 | Dose<br>(nM) |
|                                   | (ng/ml) | (nM) |                            |              |
| 2                                 | 18.0    | 51   | CD34+                      | 2.5          |
| 4                                 | 44.9    | 128  | NB4                        | 2.5          |
| 6                                 | 60.9    | 171  | Normal specimen            | 10.0         |
| Cmax: Peak plasma concentration   |         |      | AML specimen               | 20.0         |
|                                   |         |      |                            | 50.0         |
|                                   |         |      |                            | 100.0        |
|                                   |         |      |                            | 150.0        |

Am80 molecular weight: 351.44 g/mol

Clinical dose of Am80 for APL: 6 to 9 mg/m<sup>2</sup>/day

\*Investigator's brochure, Tamibarotene (INNO-507)

| Human plasma concentration** |         | Cell culture concentration |                 |
|------------------------------|---------|----------------------------|-----------------|
| Subcutaneous<br>dose (µg/kg) | PK Cmax | Cell types                 | Dose<br>(ng/ml) |
|                              | (ng/ml) |                            |                 |
| 3.45                         | 4       | CD34+                      | 25              |
| 11.5                         | 49      | NB4                        | 25              |
|                              |         | Primary specimen           | 25              |

Clinical dose of GCSF for CCIN: 5 to 10 µg/kg/day

\*\*NEUPOGEN® (filgrastim) Prescribing Information  
www.NEUPOGEN.COM, 1991-2015, Amgen Inc.

**Appendix Table S1. Converting human plasma concentrations of GCSF and Am80 to equivalent cell culture doses.** Am80 and GCSF doses used in cell culture were derived from their corresponding concentrations in human plasma. **A)** Am80 doses used in cell cultures were within the pharmacokinetics (PK) plasma concentrations determined in both healthy subjects and APL patients. **B)** GCSF dose of 25 ng/ml for *in vitro* inducing granulocytic differentiation of hematopoietic precursors has been well-established (Ding et al, 2013; Hao et al, 1998; Lou et al, 2013; Luo et al, 2007). This GCSF dose established for cell culture is in the medium range of its clinical application.

**Appendix Table S2**

| Gene name                         | GenBank No.    | Forward                      | Reverse                      |
|-----------------------------------|----------------|------------------------------|------------------------------|
| <i>PU.1</i>                       | NM_001080547.1 | 5'-AGCTCAGATGAGGAGGAGGG-3'   | 5'-AACAGGAACTGGTACAGGCG-3'   |
| <i>C/EBP<math>\alpha</math></i>   | NM_004364.4    | 5'-GTCGGTGGACAAGAAGACAGCA-3' | 5'-CCTTCTGCTGCGTCTCCACG-3'   |
| <i>C/EBP<math>\beta</math></i>    | NM_005194.3    | 5'-AACTCTCTGCTTCTCCCTCTG-3'  | 5'-AAGCCCGTAGGAACATCTTT-3'   |
| <i>C/EBP<math>\epsilon</math></i> | NM_001805.3    | 5'-TGGAGAGGCATTCCAGAAAG-3'   | 5'-GCGACTCCTGGCCTATTCAG-3'   |
| <i>RAR<math>\beta</math>2</i>     | NM_016152.3    | 5'-AAGTGAGCTGTTCAGAGGCA-3'   | 5'-AATGCGTTCCGGATCCTACC-3'   |
| <i>CD18</i>                       | NM_000211.4    | 5'-TCTGCTTCTGCGGGAAGTG-3'    | 5'-ATGTACTIONGCCACAGGGTGA-3' |
| <i>CD11b</i>                      | NM_001145808.1 | 5'-GCCAGTACTGAGAGTCAAGG-3'   | 5'-CAACACTCTGGATCTGTCCT-3'   |
| <i>p21<sup>Cip/Kip</sup></i>      | NM_000389.4    | 5'-TGCCGAAGTCAGTTCCTTGT-3'   | 5'-CATTAGCGCATCACAGTCGC-3'   |
| <i>CD66a</i>                      | NM_001024912.2 | 5'-AAAATGGCCTCTCACCTGGG-3'   | 5'-GGGTCATTGGAGTGGTCCTG-3'   |
| <i>CD66b</i>                      | NM_001816.3    | 5'-GATCCTATGCCTGCCACACC-3'   | 5'-GCTGACAGTGGCTCTAGCTG-3'   |
| <i>CD66c</i>                      | NM_002483.6    | 5'-TATCCCTGAGAGGAGGCTCA-3'   | 5'-TCCAGGGGACATGCAATCTG-3'   |
| <i>LL-37</i>                      | NM_004345.4    | 5'-GACAGTGACCCTCAACCAG-3'    | 5'-CCTGGGTACAAGATTCCGCA-3'   |
| <i>GAPDH</i>                      | NM_002046.5    | 5'-CATGGCCTCCAAGGAGTAAG-3'   | 5'-AGGGGTCTACATGGCAACTG-3'   |

**Appendix Table S2.** Primers of 12 different RA-target genes used in qRT-PCR analyses.

**Appendix Table S3**

Control and test groups used  
in six different mouse CCIN models

| Group     | Control | Vehicle | GCSF | Am80 | A+G |
|-----------|---------|---------|------|------|-----|
| CPA       | -       | +       | +    | +    | +   |
| Infection | +       | +       | +    | +    | +   |

**Appendix Table S3.** Control and vehicle groups were in parallel used in different mouse CCIN models for both monitoring and evaluating *in vivo* tests.

Appendix Table S4

## The numbers of P values derived from statistical tests

| Figure 1     | Section     |                  | P-value          |             | test performed |        |
|--------------|-------------|------------------|------------------|-------------|----------------|--------|
| 1 A          | section i   | GCSF vs. Am80    | 0.000507961      | ***         | t-test         |        |
|              |             | Am80 vs. A+G     | 0.000361862      | ***         | t-test         |        |
|              | section ii  | GCSF vs. AM80    | 0.049410586      | *           | t-test         |        |
|              |             | A+G vs. Am80     | 0.019511666      | *           | t-test         |        |
|              |             | A+G vs. GCSF     | 0.002320299      | **          | t-test         |        |
|              | section iii | A+G vs. GCSF     | 8.75834E-06      | ***         | t-test         |        |
|              |             | A+G vs. Am80     | 0.000116081      | ***         | t-test         |        |
|              |             | GCSF vs. Am80    | 0.041188173      | *           | t-test         |        |
|              | section iv  |                  |                  |             |                |        |
|              |             | fMLP             | A+G vs. Am80     | 2.05126E-08 | ***            | t-test |
|              |             |                  | A+G vs. GCSF     | 6.21184E-09 | ***            | t-test |
|              |             |                  | GCSF vs. AM80    | 0.000212119 | ***            | t-test |
|              | PMA         |                  | A+G vs. GCSF     | 6.89633E-05 | ***            | t-test |
|              |             |                  | A+G vs. AM80     | 5.45779E-05 | ***            | t-test |
|              |             |                  | AM80 vs. CONTROL | 0.003398608 | **             | t-test |
|              |             |                  | GCSF vs. CONTROL | 0.000603203 | ***            | t-test |
|              | 1 B         |                  | RARB2            |             |                |        |
|              |             | day-1            | CONTROL vs. GCSF | 0.002081323 | **             | t-test |
|              |             |                  | CONTROL vs. AM80 | 0.002911097 | **             | t-test |
|              |             |                  | GCSF vs. AM80    | 0.041328424 | *              | t-test |
| GCSF vs. A+G |             |                  | 0.007199199      | **          | t-test         |        |
| AM80 vs. A+G |             |                  | 0.001283229      | **          | t-test         |        |
| day-2        |             | RARB2            |                  |             |                |        |
|              |             | CONTROL vs. GCSF | 0.011796117      | *           | t-test         |        |
|              |             | GCSF vs. AM80    | 0.000214155      | ***         | t-test         |        |
|              |             | GCSF vs. A+G     | 0.039904907      | *           | t-test         |        |
|              |             | AM80 vs. A+G     | 0.005037947      | **          | t-test         |        |
| day-6        |             | RARB2            |                  |             |                |        |
|              |             | CONTROL vs. GCSF | 0.001021988      | **          | t-test         |        |
|              |             | CONTROL vs. A+G  | 0.015849947      | *           | t-test         |        |
|              |             | GCSF vs. AM80    | 3.58724E-05      | ***         | t-test         |        |
|              |             |                  | AM80 vs. A+G     | 0.00152979  | **             | t-test |
| day-1        |             | C/EBPE           |                  |             |                |        |

|  |       |                  |             |     |        |
|--|-------|------------------|-------------|-----|--------|
|  |       | CONTROL vs. GCSF | 0.000233461 | *** | t-test |
|  |       | CONTROL vs. AM80 | 0.000744687 | *** | t-test |
|  |       | GCSF vs. A+G     | 0.001129485 | **  | t-test |
|  |       | AM80 vs. A+G     | 0.002317695 | **  | t-test |
|  |       |                  |             |     |        |
|  | day-2 | C/EBPE           |             |     |        |
|  |       | CONTROL vs. GCSF | 0.012851219 | *   | t-test |
|  |       | GCSF vs. AM80    | 0.002227852 | **  | t-test |
|  |       | GCSF vs. A+G     | 0.003629911 | **  | t-test |
|  |       | AM80 vs. A+G     | 0.011847646 | *   | t-test |
|  |       |                  |             |     |        |
|  | day-6 | C/EBPE           |             |     |        |
|  |       | CONTROL vs. GCSF | 0.020892577 | *   | t-test |
|  |       | CONTROL vs. A+G  | 0.006056347 | **  | t-test |
|  |       | GCSF vs. AM80    | 0.012460429 | *   | t-test |
|  |       | AM80 vs. A+G     | 0.003750998 | **  | t-test |
|  |       |                  |             |     |        |
|  | day-1 | CD66C            |             |     |        |
|  |       | CONTROL vs. GCSF | 0.002202712 | **  | t-test |
|  |       | CONTROL vs. AM80 | 0.002403684 | **  | t-test |
|  |       | GCSF vs. A+G     | 0.01196121  | *   | t-test |
|  |       | AM80 vs. A+G     | 0.002873151 | **  | t-test |
|  |       |                  |             |     |        |
|  | day-2 | CD66C            |             |     |        |
|  |       | GCSF vs. AM80    | 0.000156977 | *** | t-test |
|  |       | GCSF vs. A+G     | 0.001040212 | **  | t-test |
|  |       | AM80 vs. A+G     | 0.000699928 | *** | t-test |
|  |       |                  |             |     |        |
|  | day-6 | CD66C            |             |     |        |
|  |       | CONTROL vs. GCSF | 0.000810754 | *** | t-test |
|  |       | CONTROL vs. AM80 | 5.04839E-05 | *** | t-test |
|  |       | CONTROL vs. A+G  | 0.039969056 | *   | t-test |
|  |       | GCSF vs. AM80    | 2.76114E-06 | *** | t-test |
|  |       | GCSF vs. A+G     | 0.015221519 | *   | t-test |
|  |       | AM80 vs. A+G     | 0.000339287 | *** | t-test |
|  |       |                  |             |     |        |
|  | day-1 | CD66B            |             |     |        |
|  |       | CONTROL vs. A+G  | 0.029790985 | *   | t-test |
|  |       | GCSF vs. A+G     | 0.009658543 | **  | t-test |
|  |       | AM80 vs. A+G     | 0.033069002 | *   | t-test |
|  |       |                  |             |     |        |
|  | day-2 | CD11B            |             |     |        |
|  |       | CONTROL vs. AM80 | 0.005083568 | **  | t-test |
|  |       | GCSF vs. AM80    | 0.01498158  | *   | t-test |
|  |       | GCSF vs. A+G     | 0.029502637 | *   | t-test |

|     |             |                      |             |     |        |
|-----|-------------|----------------------|-------------|-----|--------|
|     | day-6       | CD18                 |             |     |        |
|     |             | CONTROL vs. GCSF     | 0.000131892 | *** | t-test |
|     |             | CONTROL vs. AM80     | 0.030181164 | *   | t-test |
|     |             | CONTROL vs. A+G      | 0.004741731 | **  | t-test |
|     |             | GCSF vs. AM80        | 0.00264742  | **  | t-test |
|     |             | GCSF vs. A+G         | 0.000283134 | *** | t-test |
|     |             | AM80 vs. A+G         | 0.001843599 | **  | t-test |
|     |             |                      |             |     |        |
|     |             |                      |             |     |        |
| 1 C | section ii  | CONTROL vs. GCSF     | 0.000708599 | *** | t-test |
|     |             | CONTROL vs. AM80     | 0.000332137 | *** | t-test |
|     |             | CONTROL vs. A+G      | 0.000181248 | *** | t-test |
|     |             | GCSF vs. AM80        | 0.000537741 | *** | t-test |
|     |             | GCSF vs. A+G         | 0.000227347 | *** | t-test |
|     |             | AM80 vs. A+G         | 0.000523553 | *** | t-test |
|     |             |                      |             |     |        |
|     |             |                      |             |     |        |
| 1 D | section i   | neutrophil vs. (-)   | 1.96E-15    | *** | t-test |
|     |             |                      |             |     |        |
|     | section ii  | AM80 vs. CONTROL     | 1.22969E-07 | *** | t-test |
|     |             | A+G vs. CONTROL      | 5.68111E-06 | *** | t-test |
|     |             | A+G vs. GCSF         | 8.35227E-06 | *** | t-test |
|     |             |                      |             |     |        |
|     | section iii | A+G vs. GCSF         | 9.298E-07   | *** | t-test |
|     |             | A+G vs. AM80         | 9.62803E-06 | *** | t-test |
|     |             | AM80 vs. CONTROL     | 0.025814088 | *   | t-test |
|     |             |                      |             |     |        |
|     |             |                      |             |     |        |
| 1 E |             | CONTROL vs. CD18 Ab  | 2.22866E-06 | *** | t-test |
|     |             | CONTROL vs. CD11b Ab | 4.56436E-06 | *** | t-test |
|     |             | CONTROL vs. COMB     | 6.13816E-05 | *** | t-test |
|     |             |                      |             |     |        |
|     |             |                      |             |     |        |
| 1 F | section i   | GCSF vs. AM80        | 0.000686193 | *** | t-test |
|     |             | GCSF vs. A+G         | 4.05964E-07 | *** | t-test |
|     |             | AM80 vs. A+G         | 0.00786187  | **  | t-test |
|     |             |                      |             |     |        |
|     | section ii  | GCSF vs. AM80        | 6.16266E-06 | *** | t-test |
|     |             | GCSF vs. A+G         | 1.09423E-05 | *** | t-test |
|     |             | AM80 vs. AM80+CD18   | 0.012608771 | *   | t-test |
|     |             | A+G vs. A+G+CD18     | 2.51628E-05 | *** | t-test |

| Figure 2 | Section    |                  | P-value     |     | test performed |
|----------|------------|------------------|-------------|-----|----------------|
| 2 A      | section ii |                  |             |     |                |
|          | FMLP       | A+G vs. GCSF     | 5.1836E-06  | *** | t-test         |
|          |            | A+G vs. AM80     | 2.18769E-05 | *** | t-test         |
|          |            | AM80 vs. CONTROL | 0.030218647 | *   | t-test         |
|          | PMA        | A+G vs. GCSF     | 0.003720838 | **  | t-test         |
|          |            | A+G vs. AM80     | 1.51091E-07 | *** | t-test         |
|          |            | GCSF vs. AM80    | 2.23123E-07 | *** | t-test         |
| 2 B      | section i  |                  |             |     |                |
|          | Day-2      | RARB2            |             |     |                |
|          |            | GCSF vs. A+G     | 0.000215334 | *** | t-test         |
|          |            | GCSF vs. AM80    | 0.000147551 | *** | t-test         |
|          |            | AM80 vs. A+G     | 0.010643082 | *   | t-test         |
|          | Day-3      | RARB2            |             |     |                |
|          |            | AM80 vs. A+G     | 0.04581776  | *   | t-test         |
|          |            | GCSF vs. A+G     | 1.81038E-06 | *** | t-test         |
|          |            | GCSF vs. AM80    | 0.001573663 | **  | t-test         |
|          | Day-6      | RARB2            |             |     |                |
|          |            | CONTROL vs. A+G  | 0.006137164 | **  | t-test         |
|          |            | AM80 vs. A+G     | 0.001765861 | **  | t-test         |
|          |            | GCSF vs. A+G     | 0.000412182 | *** | t-test         |
|          | Day-2      | C/EBPE           |             |     |                |
|          |            | CONTROL vs. AM80 | 3.79162E-05 | *** | t-test         |
|          |            | AM80 vs. A+G     | 0.00547171  | **  | t-test         |
|          |            | GCSF vs. A+G     | 0.000163628 | *** | t-test         |
|          |            | GCSF vs. AM80    | 0.000653074 | *** | t-test         |
|          | Day-3      | C/EBPE           |             |     |                |
|          |            | AM80 vs. A+G     | 0.009298449 | **  | t-test         |
|          |            | GCSF vs. A+G     | 0.045894711 | *   | t-test         |
|          | Day-6      | C/EBPE           |             |     |                |
|          |            | CONTROL vs. A+G  | 0.000622879 | *** | t-test         |
|          |            | AM80 vs. A+G     | 0.000360051 | *** | t-test         |
|          |            | GCSF vs. A+G     | 7.99109E-05 | *** | t-test         |
|          | Day-2      | CD11B            |             |     |                |
|          |            | CONTROL vs. AM80 | 0.000114921 | *** | t-test         |
|          |            | GCSF vs. A+G     | 0.000597698 | *** | t-test         |

|  |             |                  |             |     |        |
|--|-------------|------------------|-------------|-----|--------|
|  |             | GCSF vs. AM80    | 0.000112611 | *** | t-test |
|  |             |                  |             |     |        |
|  | Day-3       | CD11B            |             |     |        |
|  |             | CONTROL vs. A+G  | 0.023759931 | *   | t-test |
|  |             | AM80 vs. A+G     | 0.035363674 | *   | t-test |
|  |             | GCSF vs. AM80    | 0.002787172 | **  | t-test |
|  |             |                  |             |     |        |
|  | Day-6       | CD11B            |             |     |        |
|  |             | AM80 vs. A+G     | 0.037309836 | *   | t-test |
|  |             | GCSF vs. A+G     | 0.021684306 | *   | t-test |
|  |             |                  |             |     |        |
|  | section ii  | CONTROL vs. GCSF | 0.005948397 | **  | t-test |
|  |             | CONTROL vs. A+G  | 0.007461105 | **  | t-test |
|  |             |                  |             |     |        |
|  | section iii |                  |             |     |        |
|  | FMLP        | AM80 vs. A+G     | 0.010685223 | *   | t-test |
|  |             |                  |             |     |        |
|  | PMA         | AM80 vs. A+G     | 0.015180143 | *   | t-test |

| <b>Figure 3</b> | <b>Section</b> |                  | <b>P-value</b> |     | <b>test performed</b> |
|-----------------|----------------|------------------|----------------|-----|-----------------------|
| <b>3 A</b>      | section i      | CONTROL vs. GCSF | 0.015405547    | *   | t-test                |
|                 |                | GCSF vs. Am80    | 0.008523155    | **  | t-test                |
|                 |                | GCSF vs. A+G     | 0.001211221    | **  | t-test                |
|                 |                | Am80 vs. A+G     | 0.009552252    | **  | t-test                |
|                 |                |                  |                |     |                       |
|                 | section ii     | GCSF vs. A20     | 0.000433008    | *** | t-test                |
|                 |                |                  |                |     |                       |
| <b>3 B</b>      | section i      | CONTROL vs. GCSF | 0.004445595    | **  | t-test                |
|                 |                | GCSF vs. A20     | 7.70145E-05    | *** | t-test                |
|                 |                | GCSF vs. A20+G   | 0.043395245    | *   | t-test                |
|                 |                | GCSF vs. A100+G  | 0.008254467    | **  | t-test                |
|                 |                | GCSF vs. A150+G  | 9.57225E-05    | *** | t-test                |
|                 |                | A20 vs. A100     | 0.000199269    | *** | t-test                |
|                 |                |                  |                |     |                       |
|                 | section ii     | CONTROL vs. GCSF | 0.000151011    | *** | t-test                |
|                 |                | GCSF vs. A20     | 1.30013E-05    | *** | t-test                |
|                 |                | GCSF vs. A20+G   | 3.97667E-06    | *** | t-test                |
|                 |                | GCSF vs. A100+G  | 9.57445E-07    | *** | t-test                |
|                 |                | GCSF vs. A150+G  | 4.9421E-07     | *** | t-test                |
|                 |                | A20 vs. A20+G    | 0.001826261    | **  | t-test                |
|                 |                |                  |                |     |                       |

|            |               |                    |             |     |        |
|------------|---------------|--------------------|-------------|-----|--------|
|            | section iii   | CONTROL vs. GCSF   | 0.003480947 | **  | t-test |
|            |               | GCSF vs. A20       | 0.001089883 | **  | t-test |
|            |               | GCSF vs. A20+G     | 0.017912804 | *   | t-test |
|            |               | GCSF vs. A100+G    | 0.006184543 | **  | t-test |
|            |               | GCSF vs. A150+G    | 0.010636628 | *   | t-test |
|            |               | A100 vs. A20+G     | 3.57879E-05 | *** | t-test |
|            |               |                    |             |     |        |
|            | section iv    | CONTROL vs. GCSF   | 0.000184087 | *** | t-test |
|            |               | GCSF vs. A20       | 3.41902E-05 | *** | t-test |
|            |               | GCSF vs. A100+G    | 2.06111E-05 | *** | t-test |
|            |               | GCSF vs. A150+G    | 1.38125E-05 | *** | t-test |
|            |               | A20 vs. A20+G      | 1.9079E-05  | *** | t-test |
|            |               |                    |             |     |        |
|            |               |                    |             |     |        |
| <b>3 C</b> | section i     |                    |             |     |        |
|            | proliferation | CONTROL vs. GCSF   | 0.00014365  | *** | t-test |
|            |               | GCSF vs. A150      | 0.004845773 | **  | t-test |
|            |               | GCSF vs. A150+G    | 0.001760537 | **  | t-test |
|            |               | A150 vs. A150+G    | 0.049190089 | *   | t-test |
|            |               |                    |             |     |        |
|            | killing       | A+G vs. CONTROL    | 9.80927E-09 | *** | t-test |
|            |               | A+G vs. GCSF       | 5.59929E-08 | *** | t-test |
|            |               | A+G vs. AM80       | 4.93609E-06 | *** | t-test |
|            |               | GCSF vs. CONTROL   | 0.00149551  | **  | t-test |
|            |               | AM80 vs. CONTROL   | 0.000168509 | *** | t-test |
|            |               |                    |             |     |        |
|            | section ii    |                    |             |     |        |
|            | proliferation | CONTROL vs. A150   | 4.89309E-06 | *** | t-test |
|            |               | CONTROL vs. A150+G | 3.43708E-06 | *** | t-test |
|            |               | GCSF vs. A150      | 3.28472E-06 | *** | t-test |
|            |               | GCSF vs. A150+G    | 2.1476E-06  | *** | t-test |
|            |               |                    |             |     |        |
|            | killing       | A+G vs. CONTROL    | 3.55759E-07 | *** | t-test |
|            |               | A+G vs. GCSF       | 1.02233E-06 | *** | t-test |
|            |               | A+G vs. AM80       | 1.95726E-09 | *** | t-test |
|            |               | AM80 vs. CONTROL   | 0.021403248 | *   | t-test |
|            |               |                    |             |     |        |
|            |               |                    |             |     |        |
| <b>3 D</b> | section i     | CONTROL vs. GCSF   | 0.000142006 | *** | t-test |
|            |               | CONTROL vs. A150   | 0.000435875 | *** | t-test |
|            |               | CONTROL vs. A150+G | 0.000341065 | *** | t-test |
|            |               | GCSF vs. A150      | 2.94998E-05 | *** | t-test |
|            |               | GCSF vs. A150+G    | 2.08592E-05 | *** | t-test |
|            |               | A150 vs. A150+G    | 0.026997302 | *   | t-test |
|            |               |                    |             |     |        |



|  |             |                    |             |     |        |
|--|-------------|--------------------|-------------|-----|--------|
|  | section ii  | CONTROL vs. GCSF   | 0.000118898 | *** | t-test |
|  |             | CONTROL vs. A150   | 1.76779E-06 | *** | t-test |
|  |             | GCSF vs. A150      | 1.24454E-06 | *** | t-test |
|  |             | GCSF vs. A150+G    | 9.79659E-05 | *** | t-test |
|  |             | A150 vs. A150+G    | 2.23732E-07 | *** | t-test |
|  | section iii | A+G vs. GCSF       | 1.38666E-05 | *** | t-test |
|  |             | A+G vs. AM80       | 0.000132157 | *** | t-test |
|  |             | GCSF vs. CONTROL   | 0.00586509  | **  | t-test |
|  |             | AM80 vs. CONTROL   | 0.003781889 | **  | t-test |
|  | section iv  | CONTROL vs. A150   | 0.000679624 | *** | t-test |
|  |             | CONTROL vs. A150+G | 1.16316E-05 | *** | t-test |
|  |             | GCSF vs. A150      | 0.00084841  | *** | t-test |
|  |             | GCSF vs. A150+G    | 1.36003E-05 | *** | t-test |
|  |             | A150 vs. A150+G    | 0.00466378  | **  | t-test |
|  | section v   | RARb2              |             |     |        |
|  |             | A150 vs. CONTROL   | 0.000785505 | *** | t-test |
|  |             | A150 vs. GCSF      | 0.001965128 | **  | t-test |
|  |             | A150+G vs. A150    | 3.84172E-05 | *** | t-test |
|  |             | CEBPe              |             |     |        |
|  |             | GCSF vs. CONTROL   | 0.007041532 | **  | t-test |
|  |             | A150 vs. GCSF      | 6.2234E-07  | *** | t-test |
|  |             | A150+G vs. A150    | 0.000405437 | *** | t-test |
|  |             | CD66c              |             |     |        |
|  |             | GCSF vs. CONTROL   | 0.000288632 | *** | t-test |
|  |             | A150 vs. GCSF      | 0.002612316 | **  | t-test |
|  |             | A150+G vs. A150    | 0.001023201 | **  | t-test |

| Figure 4 | Section    |                     | P-value     |     | test performed |
|----------|------------|---------------------|-------------|-----|----------------|
| 4 E      | section i  | GCSF vs. AM80       | 0.000101111 | *** | t-test         |
|          | section ii | GCSF vs. AM80       | 0.000371622 | *** | t-test         |
| 4 F      | section i  | CONTROL vs. VEHICLE | 0.039311426 | *   | t-test         |
|          |            | VEHICLE vs. GCSF    | 0.029330023 | *   | t-test         |
|          |            | VEHICLE vs. AM80    | 0.008443809 | **  | t-test         |
|          |            | GCSF vs. AM80       | 0.027010983 | *   | t-test         |
|          |            | GCSF vs. A+G        | 0.001746488 | **  | t-test         |

|     |             |                     |             |     |        |
|-----|-------------|---------------------|-------------|-----|--------|
|     |             | AM80 vs. A+G        | 0.000107685 | *** | t-test |
|     | section ii  | CONTROL vs. VEHICLE | 0.019103662 | *   | t-test |
|     |             | CONTROL vs. GCSF    | 0.000997507 | *** | t-test |
|     |             | VEHICLE vs. AM80    | 0.027123892 | *   | t-test |
|     |             | GCSF vs. AM80       | 0.006343464 | **  | t-test |
|     |             | GCSF vs. A+G        | 0.01559614  | *   | t-test |
|     |             | AM80 vs. A+G        | 0.026967131 | *   | t-test |
|     | section iii | CONTROL vs. VEHICLE | 0.011121655 | *   | t-test |
|     |             | VEHICLE vs. AM80    | 0.03022058  | *   | t-test |
|     |             | GCSF vs. AM80       | 0.015407895 | *   | t-test |
|     |             | AM80 vs. A+G        | 0.005188128 | **  | t-test |
| 4 I | section i   | CONTROL vs. GCSF    | 0.000379795 | *** | t-test |
|     |             | VEHICLE vs. GCSF    | 2.34434E-05 | *** | t-test |
|     |             | GCSF vs. AM80       | 0.002684044 | **  | t-test |
|     |             | GCSF vs. A+G        | 0.000403473 | *** | t-test |
|     | section ii  | CONTROL vs. GCSF    | 1.38267E-07 | *** | t-test |
|     |             | VEHICLE vs. GCSF    | 0.001066013 | **  | t-test |
|     |             | GCSF vs. AM80       | 7.65501E-05 | *** | t-test |
|     |             | GCSF vs. A+G        | 0.036176375 | *   | t-test |
| 4 J | section i   | CONTROL vs. VEHICLE | 2.88423E-06 | *** | t-test |
|     |             | CONTROL vs. A+G     | 0.018249442 | *   | t-test |
|     |             | VEHICLE vs. AM80    | 2.36543E-05 | *** | t-test |
|     |             | VEHICLE vs. A+G     | 0.00130131  | **  | t-test |
|     |             | GCSF vs. AM80       | 0.017353396 | *   | t-test |
|     | section ii  | CONTROL vs. VEHICLE | 0.049542753 | *   | t-test |
|     |             | CONTROL vs. GCSF    | 0.009862624 | **  | t-test |
|     |             | VEHICLE vs. GCSF    | 0.025986032 | *   | t-test |
|     |             | VEHICLE vs. AM80    | 0.031824836 | *   | t-test |
|     |             | GCSF vs. AM80       | 0.009180151 | **  | t-test |
|     | section iii | CONTROL vs. AM80    | 0.017553084 | *   | t-test |
|     |             | VEHICLE vs. GCSF    | 0.015309031 | *   | t-test |
|     |             | VEHICLE vs. A+G     | 0.028345175 | *   | t-test |
|     |             | GCSF vs. AM80       | 9.61344E-05 | *** | t-test |
|     |             | AM80 vs. A+G        | 0.000409851 | *** | t-test |

| <b>Figure 5</b> | <b>Section</b>    |                     | <b>P-value</b> |     | <b>test performed</b> |
|-----------------|-------------------|---------------------|----------------|-----|-----------------------|
| <b>5 C</b>      | section i         | CONTROL vs. GCSF    | 6.89177E-05    | *** | t-test                |
|                 |                   | VEHICLE vs. GCSF    | 0.010551546    | *   | t-test                |
|                 |                   | VEHICLE vs. AM80    | 0.002569943    | **  | t-test                |
|                 |                   | VEHICLE vs. A+G     | 0.000702996    | *** | t-test                |
|                 |                   | GCSF vs. A+G        | 0.003262141    | **  | t-test                |
|                 | section ii        | CONTROL vs. VEHICLE | 0.001081923    | **  | t-test                |
|                 |                   | VEHICLE vs. GCSF    | 0.002335775    | **  | t-test                |
|                 |                   | VEHICLE vs. AM80    | 0.001832213    | **  | t-test                |
|                 |                   | GCSF vs. A+G        | 0.00022431     | *** | t-test                |
|                 |                   | AM80 vs. A+G        | 9.30121E-05    | *** | t-test                |
| <b>5 D</b>      | Second layer      | GCSF vs. AM80       | 0.001670886    | **  | t-test                |
|                 |                   | AM80 vs. A+G        | 7.64088E-07    | *** | t-test                |
|                 | Third layer       | GCSF vs. AM80       | 0.00033732     | *** | t-test                |
|                 |                   | AM80 vs. A+G        | 0.008661791    | **  | t-test                |
| <b>5 E</b>      | mononuclear layer | CONTROL vs. A+G     | 0.000172534    | *** | t-test                |
|                 |                   | VEHICLE vs. A+G     | 0.000543776    | *** | t-test                |
|                 |                   | GCSF vs. A+G        | 0.000832008    | *** | t-test                |
|                 |                   | AM80 vs. A+G        | 1.01936E-05    | *** | t-test                |
|                 | neutrophil layer  | CONTROL vs. VEHICLE | 0.000258254    | *** | t-test                |
|                 |                   | CONTROL vs. GCSF    | 0.000335171    | *** | t-test                |
|                 |                   | CONTROL vs. AM80    | 7.26645E-05    | *** | t-test                |
|                 |                   | CONTROL vs. A+G     | 0.000119618    | *** | t-test                |
|                 |                   | GCSF vs. AM80       | 0.00027174     | *** | t-test                |
|                 |                   | AM80 vs. A+G        | 0.00018292     | *** | t-test                |

| <b>Figure 6</b> | <b>Section</b> |                      | <b>P-value</b> |    | <b>test performed</b>      |
|-----------------|----------------|----------------------|----------------|----|----------------------------|
| <b>6 B</b>      | section i      | Am80 + GCSF vs. GCSF | 0.002          | ** | Log Rank (Mantel-Cox) test |
| <b>6 E</b>      | section i      | Am80 + GCSF vs. GCSF | 0.001          | ** | Log Rank (Mantel-Cox) test |
| <b>6 G</b>      | section i      | Am80 + GCSF vs. GCSF | 0.128          |    | Log Rank (Mantel-Cox) test |

| Figure 7 | Section                        |                  | P-value     |     | test performed |
|----------|--------------------------------|------------------|-------------|-----|----------------|
| 7 A      | second layer                   | CONTROL vs. GCSF | 0.002069261 | **  | t-test         |
|          |                                | CONTROL vs. A+G  | 0.01912119  | *   | t-test         |
|          | third layer                    | CONTROL vs. A+G  | 1.47116E-07 | *** | t-test         |
|          |                                | GCSF vs. A+G     | 3.60129E-05 | *** | t-test         |
|          |                                |                  |             |     |                |
|          |                                |                  |             |     |                |
| 7 B      | mononuclear layer              | CONTROL vs. GCSF | 0.000211413 | *** | t-test         |
|          |                                | CONTROL vs. A+G  | 0.003623241 | **  | t-test         |
|          | neutrophil layer               | CONTROL vs. GCSF | 0.000937776 | *** | t-test         |
|          |                                | CONTROL vs. A+G  | 0.000358809 | *** | t-test         |
|          |                                |                  |             |     |                |
|          |                                |                  |             |     |                |
| 7 C      | section i<br>mononuclear layer | CONTROL vs. A+G  | 0.004621978 | **  | t-test         |
|          |                                |                  |             |     |                |
|          | section iv                     | CONTROL vs. GCSF | 0.037916073 | *   | t-test         |
|          |                                | CONTROL vs. A+G  | 0.013570868 | *   | t-test         |
|          |                                |                  |             |     |                |
|          |                                |                  |             |     |                |
| 7 D      |                                | CONTROL vs. GCSF | 0.029995596 | *   | t-test         |
|          |                                |                  |             |     |                |
| 7 E      | section ii                     | CONTROL vs. GCSF | 0.007958731 | **  | t-test         |
|          |                                | GCSF vs. A+G     | 0.008884621 | **  | t-test         |
|          | section iii                    | CONTROL vs. GCSF | 0.006175169 | **  | t-test         |
|          |                                | GCSF vs. A+G     | 0.006175169 | **  | t-test         |
|          |                                |                  |             |     |                |
|          |                                |                  |             |     |                |

| Appendix Fig. S1 | Section     |                            | P-value     |     | test performed |
|------------------|-------------|----------------------------|-------------|-----|----------------|
| S1A              | section ii  | GCSF vs. RA                | 6.43244E-05 | *** | t-test         |
|                  |             | GCSF vs. AM80              | 0.00047447  | *** | t-test         |
|                  | section iii | AM80+FMLP vs. CONTROL+FMLP | 3.05061E-05 | *** | t-test         |
|                  |             | AM80+FMLP vs. GCSF+FMLP    | 3.05274E-05 | *** | t-test         |
|                  |             | AM80+FMLP vs. RA+FMLP      | 0.000271653 | *** | t-test         |
|                  |             | RA+FMLP vs. CONTROL+FMLP   | 1.03733E-05 | *** | t-test         |
|                  |             | RA+FMLP vs. GCSF+FMLP      | 1.04376E-05 | *** | t-test         |
|                  |             |                            |             |     |                |
|                  |             |                            |             |     |                |

|            |             |                            |             |     |        |
|------------|-------------|----------------------------|-------------|-----|--------|
| <b>S1B</b> | DAY-3       | P21                        |             |     |        |
|            |             | GCSF vs. RA                | 0.000170952 | *** | t-test |
|            |             | GCSF vs. AM80              | 0.006106507 | **  | t-test |
|            |             | RA vs. AM80                | 0.001591935 | **  | t-test |
|            | DAY-3       | CEBPE                      |             |     |        |
|            |             | GCSF vs. RA                | 0.003006197 | **  | t-test |
|            |             | GCSF vs. AM80              | 0.008455783 | **  | t-test |
|            | DAY-3       | CD18                       |             |     |        |
|            |             | GCSF vs. RA                | 0.002474417 | **  | t-test |
|            |             | GCSF vs. AM80              | 0.00964762  | **  | t-test |
|            | DAY-3       | LL37                       |             |     |        |
|            |             | GCSF vs. RA                | 0.004623589 | **  | t-test |
|            |             | GCSF vs. AM80              | 0.000146811 | *** | t-test |
|            | DAY-5       | P21                        |             |     |        |
|            |             | GCSF vs. RA                | 7.4474E-05  | *** | t-test |
|            |             | GCSF vs. AM80              | 0.011420255 | *   | t-test |
|            |             | RA vs. AM80                | 0.005706583 | **  | t-test |
|            | DAY-5       | CEBPE                      |             |     |        |
|            |             | GCSF vs. RA                | 3.43255E-05 | *** | t-test |
|            |             | GCSF vs. AM80              | 9.83852E-05 | *** | t-test |
|            | DAY-5       | CD18                       |             |     |        |
|            |             | GCSF vs. RA                | 0.000249872 | *** | t-test |
|            |             | GCSF vs. AM80              | 1.91469E-05 | *** | t-test |
|            | DAY-5       | LL37                       |             |     |        |
|            |             | GCSF vs. RA                | 6.112E-08   | *** | t-test |
|            |             | GCSF vs. AM80              | 0.001109431 | **  | t-test |
|            |             | RA vs. AM80                | 0.000948947 | *** | t-test |
| <b>S1C</b> | section i   | GCSF vs. AM80              | 0.009589075 | **  | t-test |
|            |             | GCSF vs. RA                | 0.003031728 | **  | t-test |
|            |             | RA vs. AM80                | 0.018691415 | *   | t-test |
|            | section ii  | AM80 vs. GCSF              | 1.4525E-06  | *** | t-test |
|            | section iii | AM80+FMLP vs. CONTROL+FMLP | 0.013141707 | *   | t-test |
|            |             | AM80+FMLP vs. GCSF+FMLP    | 0.030642709 | *   | t-test |
|            |             | AM80+FMLP vs. RA+FMLP      | 0.004618911 | **  | t-test |

|     |  |                          |             |     |        |
|-----|--|--------------------------|-------------|-----|--------|
|     |  | RA+FMLP vs. CONTROL+FMLP | 0.000932011 | *** | t-test |
|     |  | RA+FMLP vs. GCSF+FMLP    | 0.001899765 | **  | t-test |
|     |  |                          |             |     |        |
|     |  |                          |             |     |        |
| S1D |  | RA vs. AM80              |             |     |        |
|     |  | CEBPE                    | 0.003856126 | **  | t-test |
|     |  | CEBPB                    | 0.000769532 | *** | t-test |
|     |  | CD66C                    | 0.017367763 | *   | t-test |
|     |  | CD18                     | 0.048213791 | *   | t-test |
|     |  |                          |             |     |        |
|     |  | P21                      | 0.002174544 | **  | t-test |
|     |  | CEBPA                    | 0.011533013 | *   | t-test |
|     |  | CD66A                    | 1.6E-05     | *** | t-test |
|     |  | CD66B                    | 0.000503848 | *** | t-test |

| Appendix Fig. S2 | Section |                  | P-value     |     | test performed |
|------------------|---------|------------------|-------------|-----|----------------|
| S2A              |         | CONTROL vs. GCSF | 0.001193974 | **  | t-test         |
|                  |         | GCSF vs. A2.5    | 3.29739E-06 | *** | t-test         |
|                  |         | GCSF vs. A+G     | 5.02668E-07 | *** | t-test         |
|                  |         |                  |             |     |                |
| S2B              |         | GCSF vs. AM80    | 1.24757E-06 | *** | t-test         |
|                  |         | A+G vs. GCSF     | 9.33657E-08 | *** | t-test         |
|                  |         |                  |             |     |                |
| S2C              | FMLP    | GCSF vs. AM80    | 5.91073E-05 | *** | t-test         |
|                  |         | GCSF vs. A+G     | 0.004395386 | **  | t-test         |
|                  |         |                  |             |     |                |
|                  | PMA     | GCSF vs. AM80    | 4.1466E-05  | *** | t-test         |
|                  |         | GCSF vs. A+G     | 3.08968E-05 | *** | t-test         |
|                  |         |                  |             |     |                |
| S2D              | DAY-2   | CEBPB            |             |     |                |
|                  |         | GCSF vs. AM80    | 0.004153184 | **  | t-test         |
|                  |         | AM80 vs. A+G     | 0.003568121 | **  | t-test         |
|                  |         |                  |             |     |                |
|                  | DAY-5   | CEBPB            |             |     |                |
|                  |         | CONTROL vs. GCSF | 0.01175814  | *   | t-test         |
|                  |         | GCSF vs. AM80    | 7.13811E-08 | *** | t-test         |
|                  |         | GCSF vs. A+G     | 2.86989E-05 | *** | t-test         |
|                  |         | AM80 vs. A+G     | 0.000454155 | *** | t-test         |
|                  |         |                  |             |     |                |
|                  | DAY-2   | CD66A            |             |     |                |

|  |       |                  |             |     |        |
|--|-------|------------------|-------------|-----|--------|
|  |       | GCSF vs. AM80    | 0.000101633 | *** | t-test |
|  |       | AM80 vs. A+G     | 0.001362961 | **  | t-test |
|  |       |                  |             |     |        |
|  | DAY-5 | CD66A            |             |     |        |
|  |       | GCSF vs. AM80    | 4.692E-05   | *** | t-test |
|  |       | GCSF vs. A+G     | 0.000474794 | *** | t-test |
|  |       | AM80 vs. A+G     | 0.004581575 | **  | t-test |
|  |       |                  |             |     |        |
|  | DAY-2 | CD66B            |             |     |        |
|  |       | GCSF vs. AM80    | 0.000105465 | *** | t-test |
|  |       | AM80 vs. A+G     | 0.00278499  | **  | t-test |
|  |       |                  |             |     |        |
|  | DAY-5 | CD66B            |             |     |        |
|  |       | GCSF vs. AM80    | 4.94895E-07 | *** | t-test |
|  |       | GCSF vs. A+G     | 2.99389E-10 | *** | t-test |
|  |       | AM80 vs. A+G     | 0.000279078 | *** | t-test |
|  |       |                  |             |     |        |
|  | DAY-2 | CD18             |             |     |        |
|  |       | GCSF vs. AM80    | 0.000673476 | *** | t-test |
|  |       | GCSF vs. A+G     | 2.00585E-05 | *** | t-test |
|  |       | AM80 vs. A+G     | 0.045320536 | *   | t-test |
|  |       |                  |             |     |        |
|  | DAY-5 | CD18             |             |     |        |
|  |       | CONTROL vs. GCSF | 5.19123E-05 | *** | t-test |
|  |       | GCSF vs. AM80    | 5.28823E-05 | *** | t-test |
|  |       | GCSF vs. A+G     | 2.21314E-05 | *** | t-test |
|  |       | AM80 vs. A+G     | 0.023360398 | *   | t-test |
|  |       |                  |             |     |        |
|  | DAY-2 | CD11B            |             |     |        |
|  |       | CONTROL vs. GCSF | 0.025392284 | *   | t-test |
|  |       | GCSF vs. AM80    | 3.0468E-05  | *** | t-test |
|  |       | GCSF vs. A+G     | 1.72488E-05 | *** | t-test |
|  |       | AM80 vs. A+G     | 0.003173738 | **  | t-test |
|  |       |                  |             |     |        |
|  | DAY-5 | CD11B            |             |     |        |
|  |       | CONTROL vs. GCSF | 0.044605425 | *   | t-test |
|  |       | GCSF vs. AM80    | 5.93115E-05 | *** | t-test |
|  |       | GCSF vs. A+G     | 2.84708E-05 | *** | t-test |
|  |       | AM80 vs. A+G     | 1.83442E-05 | *** | t-test |
|  |       |                  |             |     |        |
|  | DAY-2 | P21              |             |     |        |
|  |       | CONTROL vs. AM80 | 0.000962673 | *** | t-test |
|  |       | GCSF vs. AM80    | 1.85666E-05 | *** | t-test |
|  |       | AM80 vs. A+G     | 0.004574848 | **  | t-test |
|  |       |                  |             |     |        |

|  |       |                  |             |     |        |
|--|-------|------------------|-------------|-----|--------|
|  | DAY-5 | P21              |             |     |        |
|  |       | CONTROL vs. GCSF | 0.023031408 | *   | t-test |
|  |       | GCSF vs. AM80    | 0.00297427  | **  | t-test |
|  |       | GCSF vs. A+G     | 0.005083563 | **  | t-test |
|  |       |                  |             |     |        |
|  | DAY-2 | PU.1             |             |     |        |
|  |       | GCSF vs. AM80    | 2.86118E-05 | *** | t-test |
|  |       | GCSF vs. A+G     | 9.41616E-05 | *** | t-test |
|  |       | AM80 vs. A+G     | 0.004926082 | **  | t-test |
|  |       |                  |             |     |        |
|  | DAY-5 | PU.1             |             |     |        |
|  |       | CONTROL vs. GCSF | 0.026610557 | *   | t-test |
|  |       | GCSF vs. AM80    | 0.000495189 | *** | t-test |
|  |       | GCSF vs. A+G     | 2.64418E-05 | *** | t-test |
|  |       | AM80 vs. A+G     | 0.029140581 | *   | t-test |



### 3) References

- Bohlius J, Herbst C, Reiser M, Schwarzer G, Engert A (2008) Granulopoiesis-stimulating factors to prevent adverse effects in the treatment of malignant lymphoma. *Cochrane Database Syst Rev*(4): CD003189
- Chaudhry P, Yang X, Wagner M, Jong A, Wu L (2012) Retinoid-regulated FGF8f secretion by osteoblasts bypasses retinoid stimuli to mediate granulocytic differentiation of myeloid leukemia cells. *Mol Cancer Ther* 11(2): 267-276
- Crawford J, Ozer H, Stoller R, Johnson D, Lyman G, Tabbara I, Kris M, Grous J, Picozzi V, Rausch G, et al. (1991) Reduction by granulocyte colony-stimulating factor of fever and neutropenia induced by chemotherapy in patients with small-cell lung cancer. *N Engl J Med* 325(3): 164-170
- Ding W, Shimada H, Li L, Mittal R, Zhang X, Shudo K, He Q, Prasadarao NV, Wu L (2013) Retinoid agonist Am80-enhanced neutrophil bactericidal activity arising from granulopoiesis in vitro and in a neutropenic mouse model. *Blood* 121(6): 996-1007
- Gurion R, Belnik-Plitman Y, Gafter-Gvili A, Paul M, Vidal L, Ben-Bassat I, Shpilberg O, Raanani P (2012) Colony-stimulating factors for prevention and treatment of infectious complications in patients with acute myelogenous leukemia. *Cochrane Database Syst Rev* 6: CD008238
- Hao QL, Smogorzewska EM, Barsky LW, Crooks GM (1998) In vitro identification of single CD34+CD38- cells with both lymphoid and myeloid potential. *Blood* 91(11): 4145-4151
- Hartmann LC, Tschetter LK, Habermann TM, Ebbert LP, Johnson PS, Mailliard JA, Levitt R, Suman VJ, Witzig TE, Wieand HS, Miller LL, Moertel CG (1997) Granulocyte colony-stimulating factor in severe chemotherapy-induced afebrile neutropenia. *N Engl J Med* 336(25): 1776-1780
- Heath JA, Steinherz PG, Altman A, Sather H, Jhanwar S, Halpern S, Pieters R, Shah N, Steinherz L, Tannous R, Terry W, Trigg ME (2003) Human granulocyte colony-stimulating factor in children with high-risk acute lymphoblastic leukemia: a Children's Cancer Group Study. *J Clin Oncol* 21(8): 1612-1617
- Lou S, Liu G, Shimada H, Yang X, He Q, Wu L (2013) The lost intrinsic fragmentation of MAT1 protein during granulopoiesis promotes the growth and metastasis of leukemic myeloblasts. *Stem Cells* 31(9): 1942-1953
- Luo P, Wang A, Payne KJ, Peng H, Wang JG, Parrish YK, Rogerio JW, Triche TJ, He Q, Wu L (2007) Intrinsic retinoic acid receptor alpha-cyclin-dependent kinase-activating kinase signaling involves coordination of the restricted proliferation and granulocytic differentiation of human hematopoietic stem cells. *Stem Cells* 25(10): 2628-2637
- Mhaskar R, Clark OA, Lyman G, Engel Ayer Botrel T, Morganti Paladini L, Djulbegovic B (2014) Colony-stimulating factors for chemotherapy-induced febrile neutropenia. *Cochrane Database Syst Rev* 10: CD003039
- Sung L, Nathan PC, Alibhai SM, Tomlinson GA, Beyene J (2007) Meta-analysis: effect of prophylactic hematopoietic colony-stimulating factors on mortality and outcomes of infection. *Ann Intern Med* 147(6): 400-411
- Trillet-Lenoir V, Green J, Manegold C, Von Pawel J, Gatzemeier U, Lebeau B, Depierre A, Johnson P, Decoster G, Tomita D, et al. (1993) Recombinant granulocyte colony stimulating factor reduces the infectious complications of cytotoxic chemotherapy. *Eur J Cancer* 29A(3): 319-324
- Wang JG, Barsky LW, Davicioni E, Weinberg KI, Triche TJ, Zhang XK, Wu L (2006) Retinoic acid induces leukemia cell G1 arrest and transition into differentiation by inhibiting cyclin-dependent kinase-activating kinase binding and phosphorylation of PML/RARalpha. *FASEB J* 20(12): 2142-2144
